# Supplementary material
Source: PubMed Central journal article supplement (PMC6067647)
Supplement: res-0095-0220-s01.pdf [file res-0095-0220-s01.pdf]

## Supplemental data

| <b>Number</b> | <b>Time of residual disease after EBT (yrs)</b> | <b>Treatment of residual disease</b> | <b>Outcome</b>        |
|---------------|-------------------------------------------------|--------------------------------------|-----------------------|
| <b>1</b>      | 0.3                                             | Lobectomy                            | Alive without disease |
| <b>2</b>      | 1.0                                             | Lobectomy                            | Alive without disease |
| <b>3</b>      | 1.6                                             | Lobectomy                            | Alive without disease |
| <b>4</b>      | 2.0                                             | EBT                                  | Alive without disease |

Table 4a: residual disease after EBT ( $\leq 2$  years)

| <b>Number</b> | <b>Time of recurrence after EBT (yrs)</b> | <b>Treatment of recurrence</b> | <b>Outcome</b>        |
|---------------|-------------------------------------------|--------------------------------|-----------------------|
| <b>1</b>      | 3.7                                       | Lobectomy                      | Alive without disease |
| <b>2</b>      | 5.2                                       | No treatment <sup>∞</sup>      | Alive with disease    |
| <b>3</b>      | 8.6                                       | Pneumonectomy                  | Alive without disease |
| <b>4</b>      | 9.5                                       | Pneumonectomy                  | Alive without disease |
| <b>5</b>      | 11.9                                      | EBT*                           | Alive with disease    |
| <b>6</b>      | 16.5                                      | Bronchus sleeve resection      | Alive without disease |

Table 4b: recurrences after EBT (>2 years), <sup>∞</sup>refused EBT and surgery, \*refused surgery.

| <b>Deaths during follow up</b> | <b>Interval death after first EBT (months)</b> | <b>Cause</b>            |
|--------------------------------|------------------------------------------------|-------------------------|
| <b>1</b>                       | 4                                              | <i>Dead other cause</i> |
| <b>2</b>                       | 26                                             | <i>Dead other cause</i> |
| <b>3</b>                       | 62                                             | <i>Dead other cause</i> |
| <b>4</b>                       | 83                                             | <i>Dead other cause</i> |
| <b>5</b>                       | 120                                            | <i>Dead other cause</i> |
| <b>6</b>                       | 171                                            | <i>Dead other cause</i> |
| <b>7</b>                       | 223                                            | <i>Dead other cause</i> |
| <b>8</b>                       | unknown                                        | <i>Dead other cause</i> |
| <b>Mean survival</b>           | 207 (SD 181-232)                               |                         |

Table 5a. Deaths during follow up in patients with successful EBT (n=61) .

| <b>Deaths during follow up</b> | <b>Interval death after first EBT (months)</b> | <b>Cause</b>                       |
|--------------------------------|------------------------------------------------|------------------------------------|
| <b>1</b>                       | 12                                             | <i>Postoperative complications</i> |
| <b>2</b>                       | 24                                             | <i>Dead other cause</i>            |
| <b>3</b>                       | 60                                             | <i>Dead other cause</i>            |
| <b>4</b>                       | 81                                             | <i>Metastatic disease</i>          |
| <b>5</b>                       | unknown                                        | <i>Metastatic disease</i>          |
| <b>Mean survival</b>           | 251 (SD 222-281)                               |                                    |

Table 5b. Deaths during follow up in patients with unsuccessful EBT and surgery (n=64).
